# Supplementary material for: The different natural estrogens promote endothelial healing through distinct cell targets
Source: JCI journal article supplement (doi:10.1172/jci.insight.161284), 2023-02-02
Supplement: sd1 [file 1]

You are being redirected.
